# Supplementary material for: Regulation of conjugate rigid plane structures for achieving transformation of fluorescence recognition properties
Source: Royal Society of Chemistry journal article supplement (doi:10.1039/d1nj05911d), 2022-01-01
Supplement: d1nj05911d1.pdf [file d1nj05911d1.pdf]

*Supplemental Information*

**Regulation of Conjugate Rigid Plane Structure to Achieving  
Transform Different Properties**

Xiao-Tong Kan<sup>a</sup>, Hong Yao<sup>\*a</sup>, Yan-Bing Niu<sup>a</sup>, Yin-Ping Hu,<sup>a</sup> You-Ming Zhang<sup>a,b</sup>,  
Tai-Bao Wei<sup>a</sup>, and Qi Lin<sup>\*a</sup>

<sup>[a]</sup> Key Laboratory of Eco-Environment-Related Polymer Materials, Ministry of Education of China, Key Laboratory of Polymer Materials of Gansu Province; College of Chemistry and Chemical Engineering, Northwest Normal University, Lanzhou, Gansu, 730070. P. R. China

E-mail: [yhxbz@126.com](mailto:yhxbz@126.com) ; [linqi2004@126.com](mailto:linqi2004@126.com) ;

<sup>[b]</sup> Gansu Natural Energy Research Institute, Lanzhou, Gansu 730046, China

## Table of Contents

**Fig. S1.**  $^1\text{H}$  NMR (600 MHz, 298K) spectra of **B**<sub>1</sub> in DMSO-*d*<sub>6</sub>.

**Fig. S2.**  $^1\text{H}$  NMR (600 MHz, 298K) spectra of **B**<sub>2</sub> in DMSO-*d*<sub>6</sub>.

**Fig. S3.**  $^1\text{H}$  NMR (600 MHz, 298K) spectra of **B**<sub>3</sub> in DMSO-*d*<sub>6</sub>.

**Fig. S4.** FT-IR spectrum of **B**<sub>1</sub>, **B**<sub>2</sub>, **B**<sub>3</sub>.

**Fig. S5.** Fluorescence quantum yield according to the corresponding formula (using quinoline sulfate as standard).

**Fig. S6.** (a-c) Fluorescent spectrum linear range for  $\text{Hg}^{2+}$  by addition of various concentrations of  $\text{Hg}^{2+}$  into **B**<sub>1</sub>, **B**<sub>2</sub> and **B**<sub>3</sub>. (d-f) The photograph of the linear range based on Bensi-Hildebrand equation to calculated  $K_a$  between  $\text{Hg}^{2+}$  with **B**<sub>1</sub>, **B**<sub>2</sub> and **B**<sub>3</sub>.

**Table S1.** Calculation formula and related data of the detection limits of **B**<sub>1</sub>, **B**<sub>2</sub>, **B**<sub>3</sub>.

**Table S2.** Association constants of the **B**<sub>1</sub>, **B**<sub>2</sub>, **B**<sub>3</sub> treated by  $\text{Hg}^{2+}$ , calculation formula and related data.

**Fig. S7.** The optimized structure, frontier orbitals (HOMO and LUMO) and electronic potential maps (ESP) of **B**<sub>1</sub>, **B**<sub>2</sub> and **B**<sub>3</sub>.

**Fig. S8.** The simulated spectrum and measured spectrum of **B**<sub>1</sub>, **B**<sub>2</sub> and **B**<sub>3</sub>.

**Fig. S9.** (a) Chemical shift equimolar ratio diagram of **B**<sub>1</sub>.(b) Job's plot of **B**<sub>2</sub> and **B**<sub>3</sub>.

## Synthesis of compound **B**<sub>1</sub>, **B**<sub>2</sub> and **B**<sub>3</sub>

We synthesized compound **B**<sub>1</sub>, **B**<sub>2</sub> and **B**<sub>3</sub> according to the literature. The amidation reaction was carried out at low temperature by grinding method, and then the ring-closure reaction was completed during reflux. The 1,2-diaminobenzene (7.2 g, 67 mmol), polyphosphoric acid (12 mL) and oxalic acid (4.2 g, 33 mmol) were added to ethylene glycol (50 mL). The solution was refluxed 1.5 h at 160°C. Then cool to room temperature, deionized water (300 mL) was added. After filtration, the product was recrystallized to obtain **B**<sub>1</sub> as a yellow needle-like solid (12.9 g, yield 83.0%). The 1,2-diaminobenzene (7.2 g, 67 mmol), polyphosphoric acid (12 mL) and 1,4-dicarboxybenzene (4.2 g, 33 mmol) were added to ethylene glycol (50 mL). The 1,2-diaminobenzene (7.2 g, 67 mmol), polyphosphoric acid (12 mL) and Diphtalic acid (4.2 g, 33 mmol) were added to ethylene glycol (50 mL). The synthesis method of **B**<sub>2</sub> (yield 78.7%), **B**<sub>3</sub> (yield 62.7%) the same as that of **B**<sub>1</sub>. **B**<sub>1</sub>: <sup>1</sup>H NMR (DMSO-*d*<sub>6</sub>, 600 MHz), δ/ppm: 13.48 (s, 2H), 7.61 (s, 2H), 7.41 (s, 2H), 7.27 (s, 2H), 7.26 (s, 2H); **B**<sub>2</sub>: <sup>1</sup>H NMR (DMSO-*d*<sub>6</sub>, 600 MHz) δ/ppm: 13.21 (s, 2H), 8.41 (s, 4H), 7.87 (s, 4H), 7.30 (s, 4H); **B**<sub>3</sub>: <sup>1</sup>H NMR (DMSO-*d*<sub>6</sub>, 600 MHz) δ/ppm: 13.11 (s, 2H), 8.44 (s, 4H), 8.15 (s, 4H), 7.80 (s, 4H), 7.30 (s, 4H);

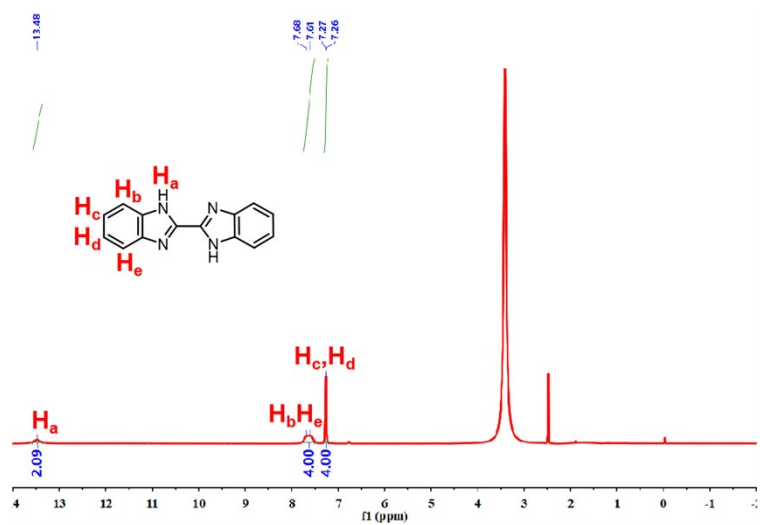

Fig. S1 <sup>1</sup>H NMR (400 MHz, 298K) spectra of **B<sub>1</sub>** in DMSO-*d*<sub>6</sub>.

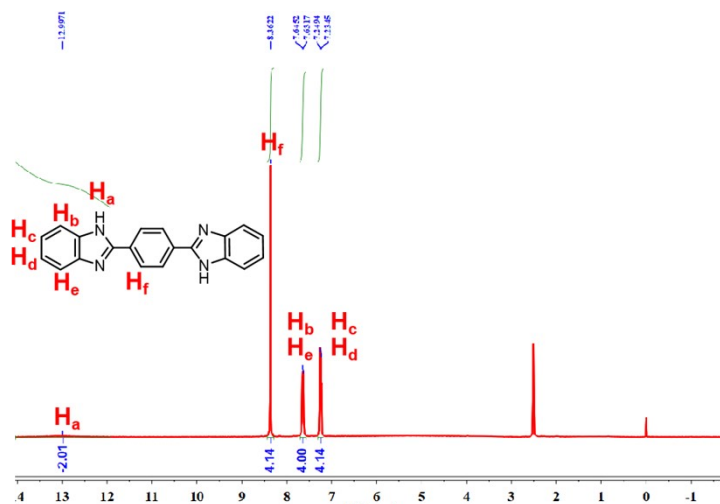

Fig. S2 <sup>1</sup>H NMR (400 MHz, 298K) spectra of **B<sub>2</sub>** in DMSO-*d*<sub>6</sub>.

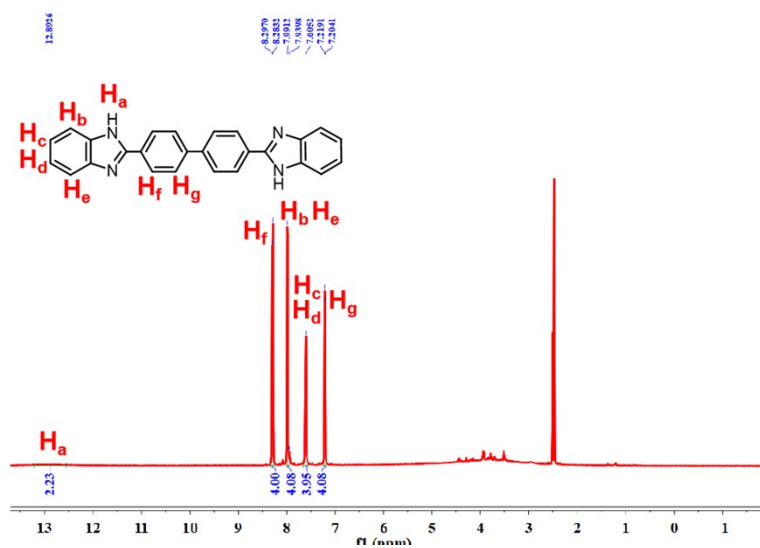

Fig. S3 <sup>1</sup>H NMR (400 MHz, 298K) spectra of **B<sub>3</sub>** in DMSO-*d*<sub>6</sub>.

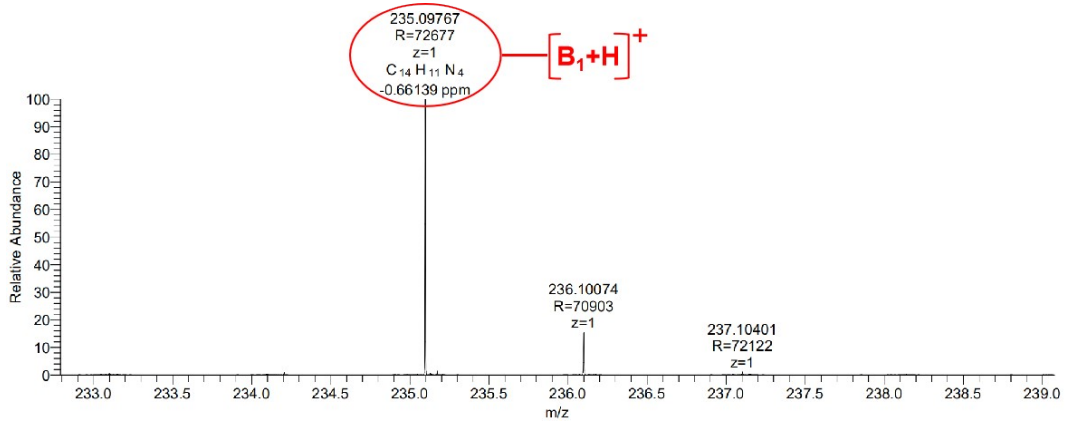

Fig. S4 HR-MS Spectrum of B<sub>1</sub>.

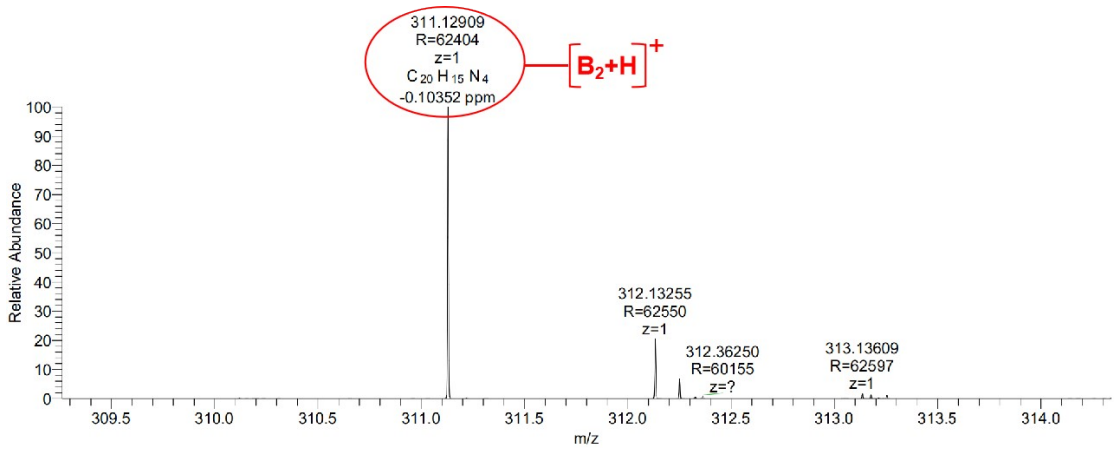

Fig. S5 HR-MS Spectrum of B<sub>2</sub>.

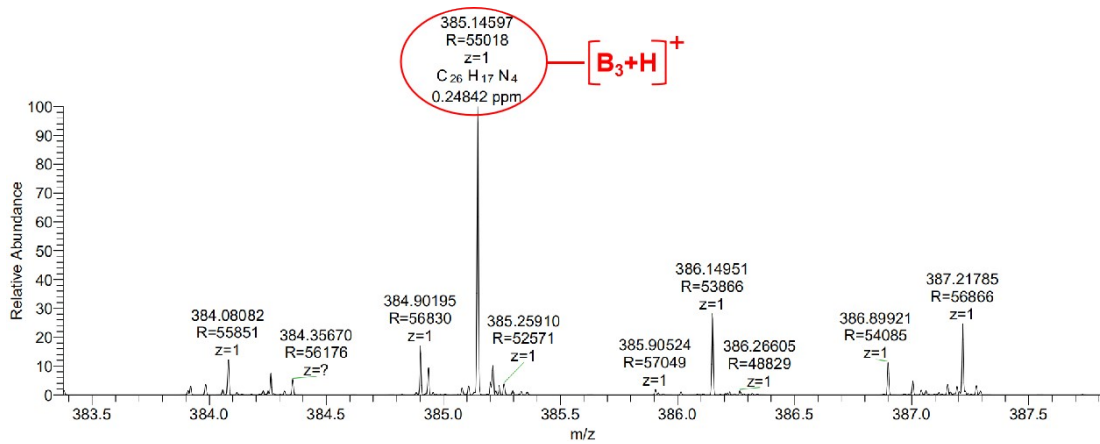

Fig. S6 HR-MS Spectrum of B<sub>3</sub>.

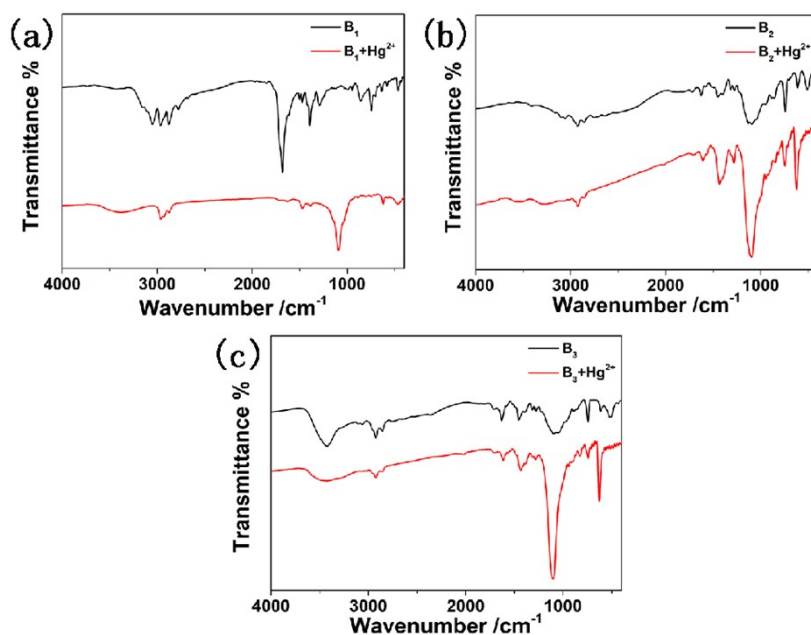

Fig. S7 FT-IR spectrum of B<sub>1</sub>, B<sub>2</sub>, B<sub>3</sub>.

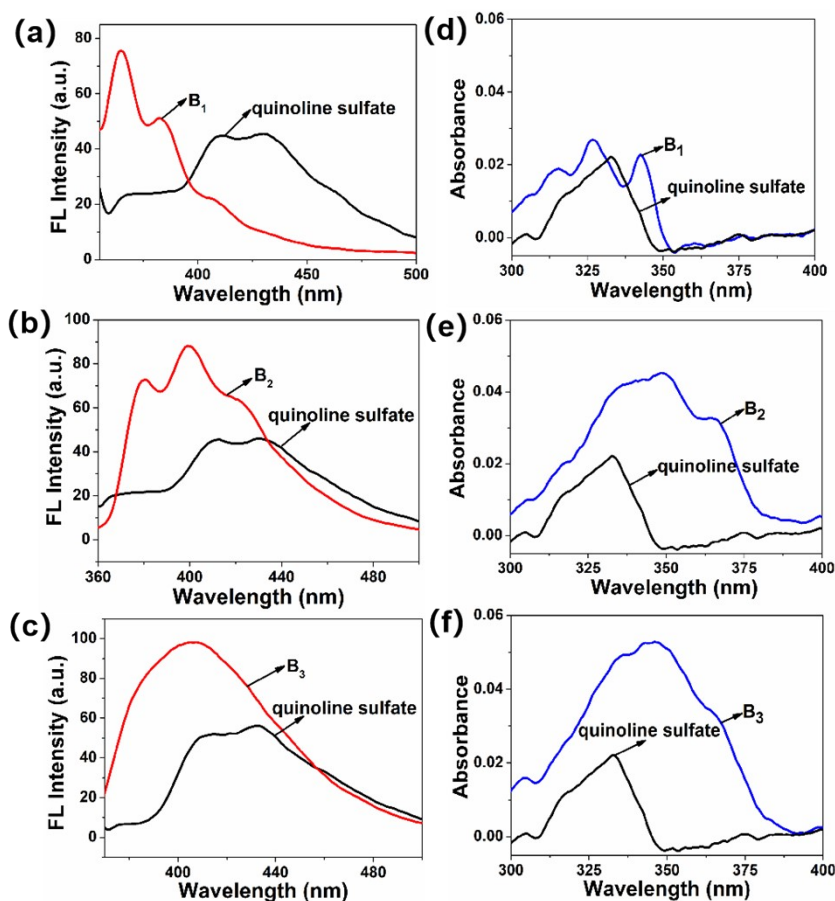

Fig. S8 Fluorescence quantum yield according to the corresponding formula (using quinoline sulfate as standard).

The fluorescence quantum yield of the sample was calculated using quinine sulfate as the standard ( $\Phi_{\text{std}} = 0.55$ ). In this equation,  $\Phi_B$  and  $\Phi_{\text{std}}$  are the fluorescence

quantum yields of the sample and the standard, respectively;  $I_B$  and  $I_{std}$  are the integral areas of the fluorescent spectra, respectively;  $A_B$  and  $A_{std}$  are the absorbances of the sample and the standard at the excitation wavelength, respectively.

$$\Phi_B = \Phi_{std} \times (I_B / I_{std}) \times (A_{std} / A_B) \Phi_{std}$$

$$\Phi_{B1} = 0.55 \times (2760.63 / 3393.82) \times (0.0224 / 0.0227) = 0.43$$

$$\Phi_{B2} = 0.55 \times (6024.76 / 3493.76) \times (0.0221 / 0.0453) = 0.46$$

$$\Phi_{B3} = 0.55 \times (7411.26 / 3756.88) \times (0.0221 / 0.0528) = 0.45$$

Fluorescence quantum yield: 43.0%, 46.0%, 45.0%.

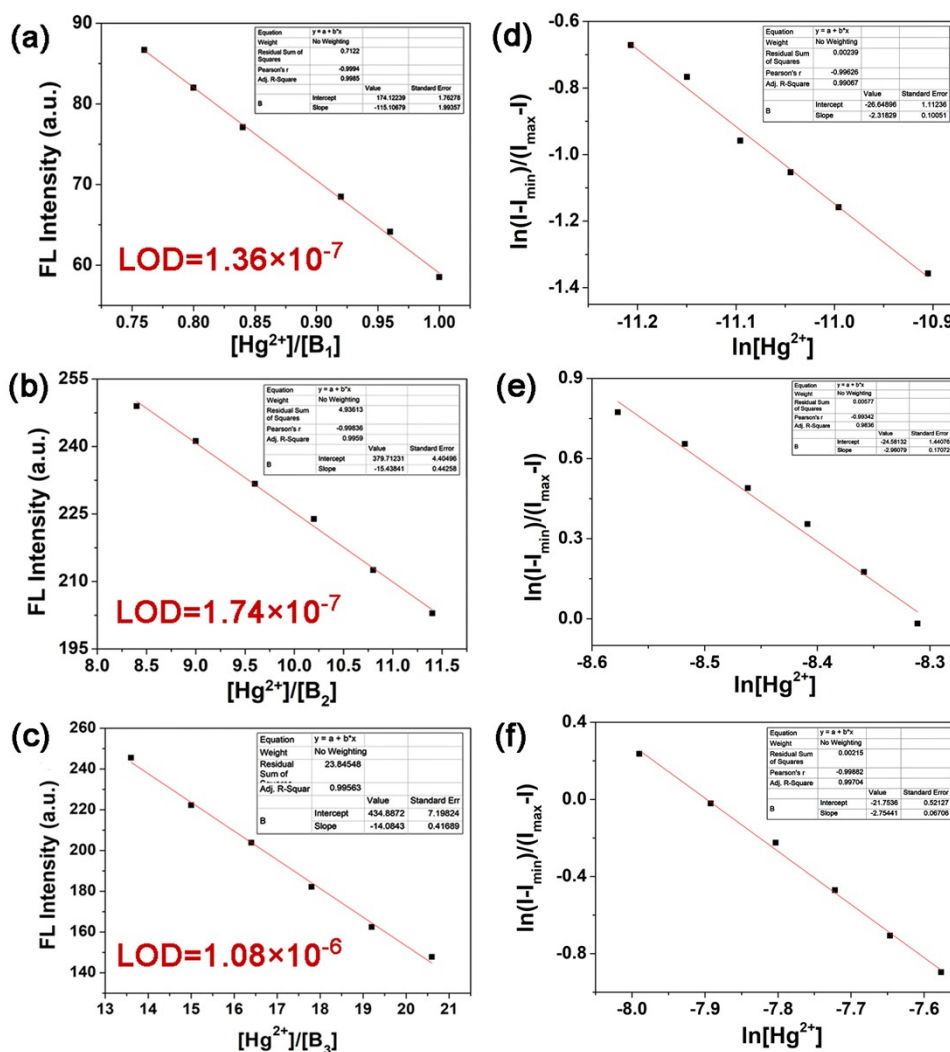

**Fig. S9** (a-c) Fluorescent spectrum linear range for  $Hg^{2+}$  by addition of various concentrations of  $Hg^{2+}$  into  $B_1$ ,  $B_2$  and  $B_3$ . (d-f) The photograph of the linear range based on Bensi-Hildebrand equation to calculated  $K_a$  between  $Hg^{2+}$  with  $B_1$ ,  $B_2$  and  $B_3$ .

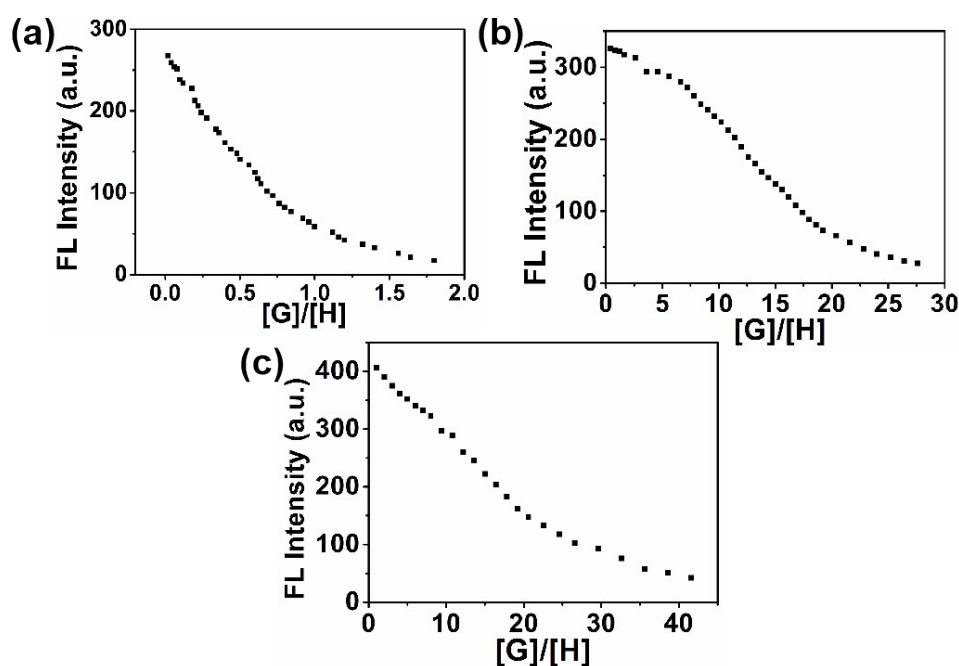

**Fig. S10** A plot of fluorescent intensity depending on the concentration of  $\text{Hg}^{2+}$  in the range from different equivalents: (a)  $\text{B}_1$ , (b)  $\text{B}_2$  and (c)  $\text{B}_3$ .

**Table S1** Comparison of recognition and adsorption properties of  $\text{B}_1$ ,  $\text{B}_2$  and  $\text{B}_3$  with other reported sensors.

| Materials                                                                     | Detection Ion    | Recognition property | Adsorption property | Ref.      |
|-------------------------------------------------------------------------------|------------------|----------------------|---------------------|-----------|
| Biocompatible Nanodendrimer                                                   | $\text{Hg}^{2+}$ | -                    | √                   | [20]      |
| Magnetic bentonite (M-B)                                                      | $\text{Hg}^{2+}$ | -                    | √                   | [21]      |
| Diethylenetriaminepentaacetic acid-modified cellulose                         | $\text{Hg}^{2+}$ | -                    | √                   | [22]      |
| L-Cysteine Functionalized UiO-66 MOFs                                         | $\text{Hg}^{2+}$ | -                    | √                   | [23]      |
| Mesoporous Silica–Gelatin Aerogels                                            | $\text{Hg}^{2+}$ | -                    | √                   | [24]      |
| Rhodamine-naphthalimide conjugated chemosensor                                | $\text{Hg}^{2+}$ | √                    | -                   | [25]      |
| Nitrogen-doped carbon dots                                                    | $\text{Hg}^{2+}$ | √                    | -                   | [26]      |
| Fluorescent monomer of boron dipyrromethene (BODIPY) derivative               | $\text{Hg}^{2+}$ | √                    | -                   | [27]      |
| Luminescent complex                                                           | $\text{Hg}^{2+}$ | √                    | -                   | [28]      |
| FeOOH modified nanoporous gold microelectrode                                 | $\text{Hg}^{2+}$ | √                    | -                   | [29]      |
| Bisbenzimidazole derivatives ( $\text{B}_1$ , $\text{B}_2$ and $\text{B}_3$ ) | $\text{Hg}^{2+}$ | √                    | √                   | This work |



**Table S2.** Calculation formula and related data of the detection limits of **B<sub>1</sub>**, **B<sub>2</sub>**, **B<sub>3</sub>**.

| Compound       | A(Slope) | B(Intercept) | R <sup>2</sup> | δ     | S                    |
|----------------|----------|--------------|----------------|-------|----------------------|
| B <sub>1</sub> | 115.106  | 174.122      | 0.998          | 5.239 | 1.15×10 <sup>8</sup> |
| B <sub>2</sub> | 15.438   | 379.712      | 0.995          | 0.953 | 1.63×10 <sup>7</sup> |
| B <sub>3</sub> | 14.084   | 434.887      | 0.995          | 5.111 | 1.40×10 <sup>7</sup> |

Linear Equation: y=Ax + B

calculation formula  $\delta = \sqrt{\frac{\sum (F - \bar{F})^2}{(N-1)}}$       N=20      K=3      S = A×10<sup>6</sup>

$LOD = K \times \delta / S$

**Table S3.** Association constants of the **B<sub>1</sub>**, **B<sub>2</sub>**, **B<sub>3</sub>** treated by Hg<sup>2+</sup>, calculation formula and related data.

| Compound       | Metal ions       | A(Slope) | B(Intercept) | R <sup>2</sup> | Ka/ M <sup>-2</sup>   |
|----------------|------------------|----------|--------------|----------------|-----------------------|
| B <sub>1</sub> | Hg <sup>2+</sup> | 2.32     | 26.67        | 0.994          | 3.83×10 <sup>11</sup> |
| B <sub>2</sub> | Hg <sup>2+</sup> | 2.96     | 24.58        | 0.993          | 4.73×10 <sup>10</sup> |
| B <sub>3</sub> | Hg <sup>2+</sup> | 2.75     | 21.75        | 0.997          | 2.79×10 <sup>9</sup>  |

calculation formula      Linear Equation: y=Ax + B

$\text{Ln} \frac{I - I_{\min}}{I_{\max} - I} = \text{Ln}Ka + n\text{Ln}[M^{2+}]$

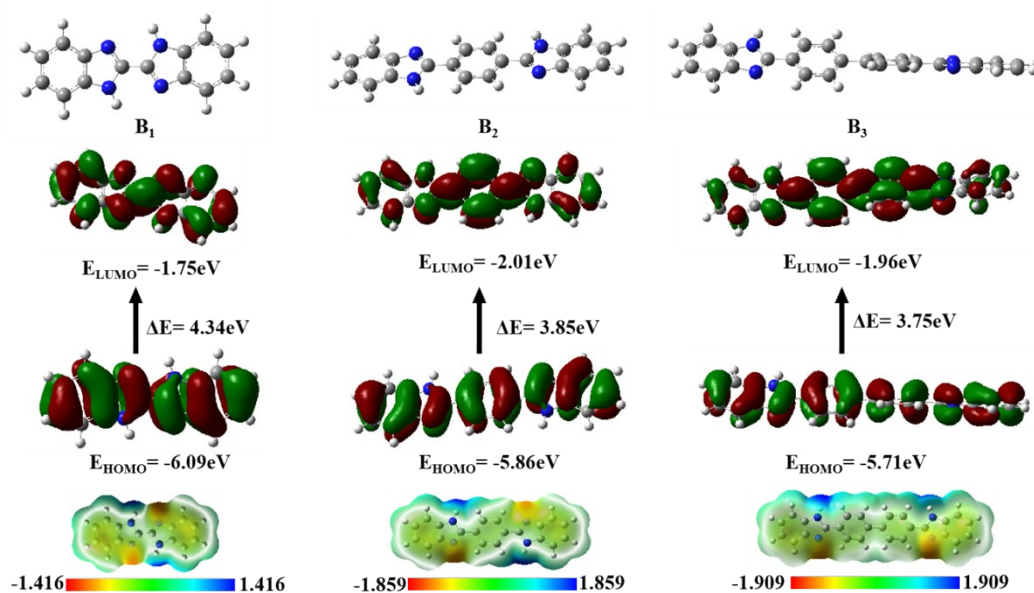**Fig. S11.** The optimized structure, frontier orbitals (HOMO and LUMO) and electronic potential maps (ESP) of **B<sub>1</sub>**, **B<sub>2</sub>** and **B<sub>3</sub>**.

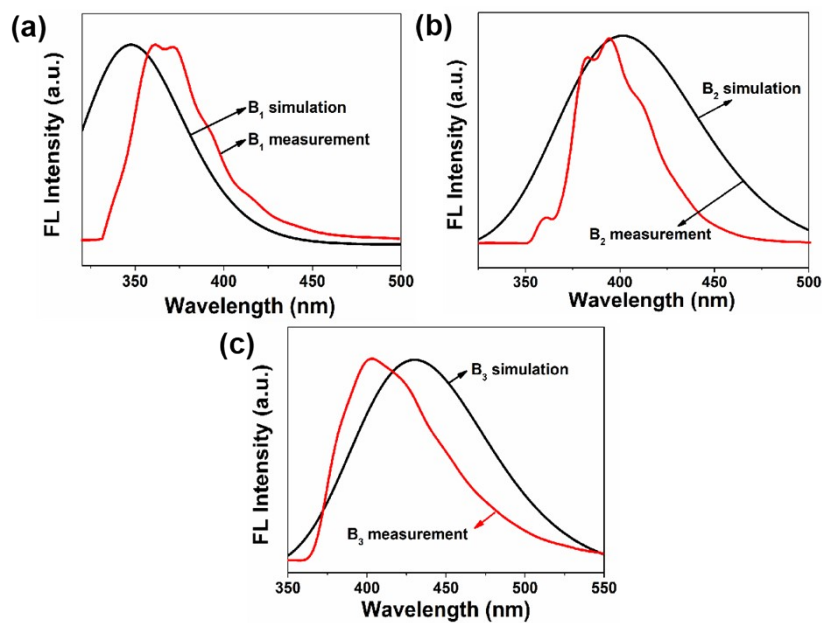

**Fig. S12.** The simulated spectrum and measured spectrum of **B<sub>1</sub>**, **B<sub>2</sub>** and **B<sub>3</sub>**.

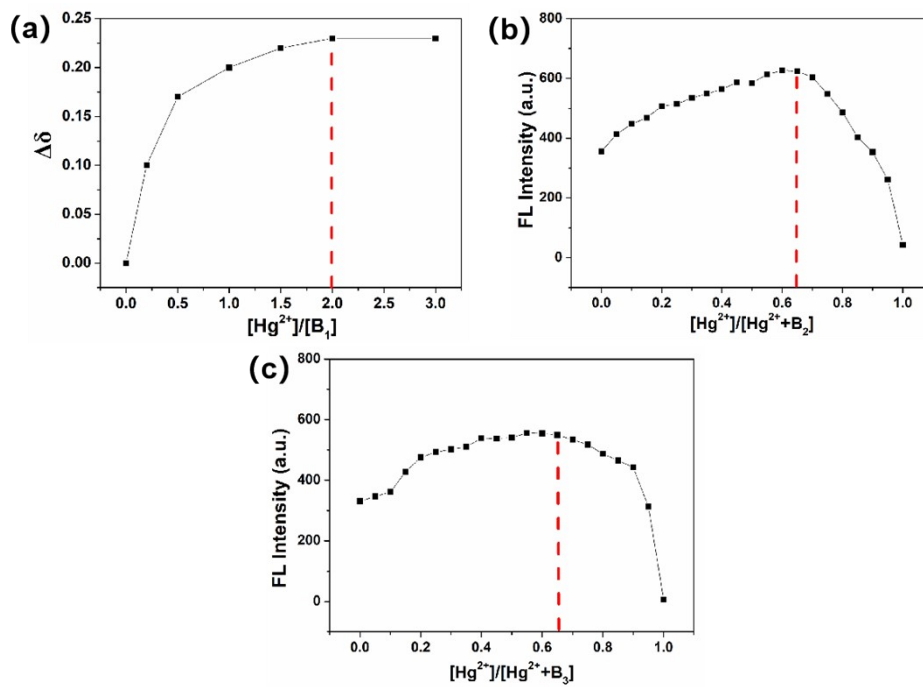

**Fig. S13.** (a) Chemical shift equimolar ratio diagram of **B<sub>1</sub>**. (b) Job's plot of **B<sub>2</sub>** and **B<sub>3</sub>**.

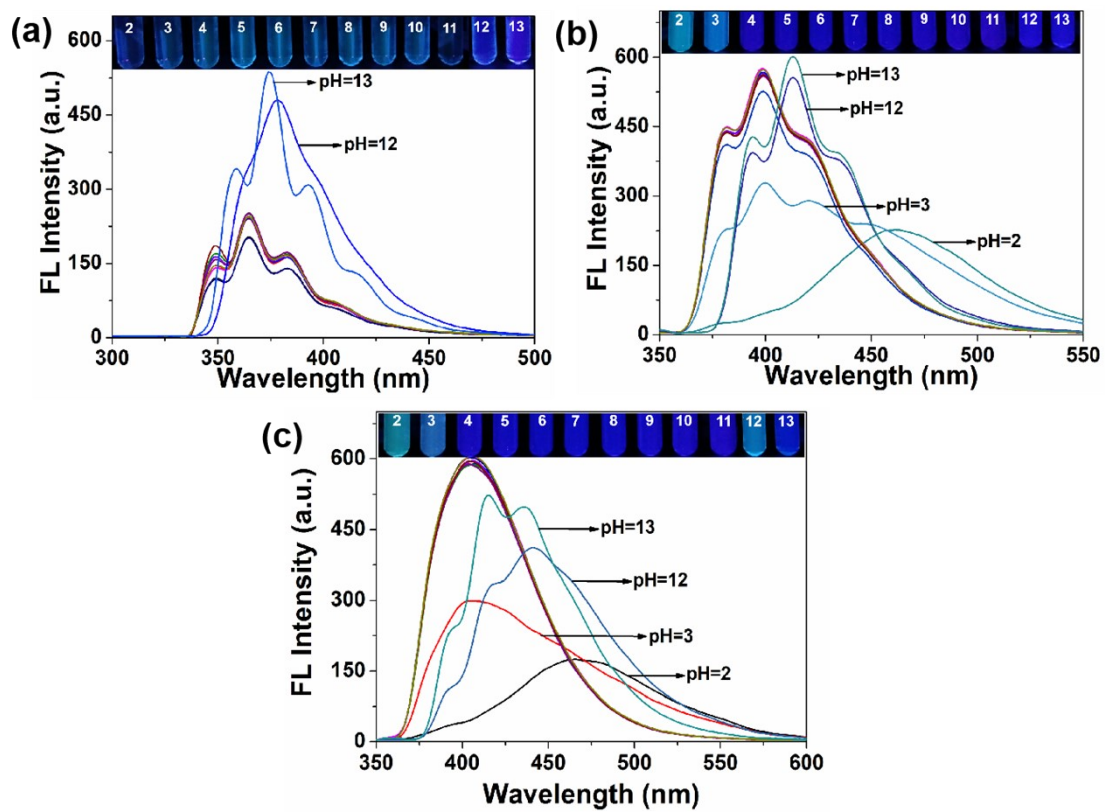

Fig. S14 Fluorescence stability (a)  $B_1$  , (b)  $B_2$  , (c)  $B_3$  in various pH conditions.
